# Supplementary material for: Antibacterial activity of male and female sperm-storage organs in ants
Source: Oxford University Press journal article supplement (doi:10.1242/jeb.175158), 2018-01-01
Supplement: jeb175158supp.pdf [file jeb175158supp.pdf]

**Fig. S1. Antibacterial activity in spermathecae and control tissues of mated *Lasius niger* queens with corresponding egg laying rates.**

The mean antibacterial activity (ABA) values ( $\pm$  SD) in the mated queen spermathecae (black dots) and control tissues (i.e. head-thorax homogenates; white squares) during the first 30 days after mating are given in the lower part of the figure. They reflect ABA relative to that of the negative control (i.e., free growth; see Methods). Values  $> 0$  mean ABA was present; values  $= 0$  mean there was no difference in activity between the sample type and the negative control; and values  $< 0$  indicate that bacterial growth was enhanced. Statistically significant differences in ABA between consecutive time points are indicated in spermathecal contents and control tissues by capital and lower-case letters, respectively.

Mated queen egg laying rate over the first 30 days after mating is shown in the upper part of the figure. Horizontal bars represent the mean number of eggs laid per day ( $\pm$  SD) over the following periods of time: 0-1 day, 5-10 days, 10-20 and 20-30 days after mating. Given that mated queen egg laying rate was calculated as part of another study, these queens are not the same as the ones used for ABA measures. Sample sizes are indicated above (egg laying) or beneath (ABA) error bars.

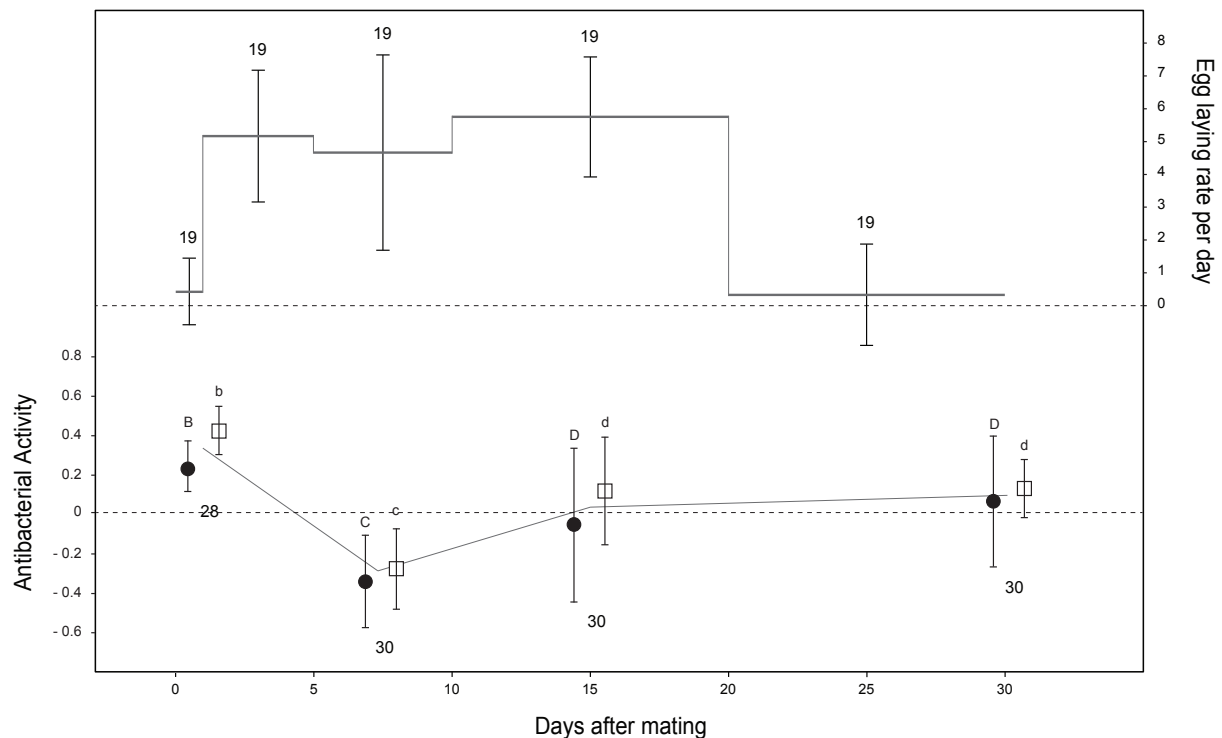

**Table S1. Antibacterial activity (ABA) index of sperm-storage organ contents from males (accessory testes) and females (spermatheca of virgin queens (i.e., gynes), and of 1-day, 1-week, 2-week and 4-week mated queens), and of head-thorax homogenates (homo), in the ant *Lasius niger*.**

The ABA index is calculated as  $ABA = 1 - (\text{sample OD}/\text{negative control OD})$  (see Methods).

| ABA          | Tissue | Individual |
|--------------|--------|------------|
| -0.484793585 | sperm  | male       |
| -0.071197236 | sperm  | male       |
| -0.588625304 | sperm  | male       |
| -0.142148911 | sperm  | male       |
| -0.175028955 | sperm  | male       |
| -0.342890235 | sperm  | male       |
| -0.325584948 | sperm  | male       |
| -0.555745259 | sperm  | male       |
| -0.211370057 | sperm  | male       |
| -0.124843625 | sperm  | male       |
| -0.493446228 | sperm  | male       |
| -0.453644069 | sperm  | male       |
| -0.439799839 | sperm  | male       |
| -0.114460453 | sperm  | male       |
| -0.931269977 | sperm  | male       |
| -0.150801554 | sperm  | male       |
| -0.102346752 | sperm  | male       |
| 0.02398184   | sperm  | male       |
| -0.277130146 | sperm  | male       |
| -0.265016445 | sperm  | male       |
| -0.348075188 | sperm  | male       |
| -0.437137213 | sperm  | male       |
| -0.639550905 | sperm  | male       |
| -0.58557392  | sperm  | male       |
| -0.542392333 | sperm  | male       |
| -0.644948603 | sperm  | male       |
| -0.107877607 | sperm  | male       |
| -0.558585428 | sperm  | male       |
| -0.653045151 | sperm  | male       |
| -0.331882093 | sperm  | male       |
| -0.561284277 | sperm  | male       |
| -0.730997014 | sperm  | male       |
| -0.334987893 | sperm  | male       |
| -0.280986649 | sperm  | male       |
| -0.242414332 | sperm  | male       |
| -0.766997843 | sperm  | male       |
| -0.378703185 | sperm  | male       |
| -0.05726721  | sperm  | male       |
| -0.622994526 | sperm  | male       |
| -0.1957953   | homo   | male       |
| -0.310010191 | homo   | male       |
| -0.306549133 | homo   | male       |
| 0.151211918  | homo   | male       |
| -0.79608416  | homo   | male       |
| -0.751568916 | homo   | male       |
| -0.345273844 | homo   | male       |

|              |          |      |
|--------------|----------|------|
| 0.15268962   | homo     | male |
| 0.498478626  | homo     | male |
| 0.222458535  | homo     | male |
| 0.236717876  | homo     | male |
| 0.262180984  | homo     | male |
| 0.05847612   | homo     | male |
| 0.242829022  | homo     | male |
| 0.539219598  | homo     | male |
| 0.083939228  | homo     | male |
| -0.094302528 | homo     | male |
| 0.562645658  | homo     | male |
| 0.059494644  | homo     | male |
| -0.024449566 | control- | male |
| -0.023194831 | control- | male |
| 0.011175651  | control- | male |
| 0.006032675  | control- | male |
| 0.030436071  | control- | male |
| 0.295103764  | sperm    | gyne |
| 0.446152957  | sperm    | gyne |
| 0.784869331  | sperm    | gyne |
| 0.217290543  | sperm    | gyne |
| 0.052509605  | sperm    | gyne |
| 0.556006916  | sperm    | gyne |
| 0.298808645  | sperm    | gyne |
| 0.162363564  | sperm    | gyne |
| 0.103116837  | sperm    | gyne |
| 0.281372019  | sperm    | gyne |
| 0.299730943  | sperm    | gyne |
| 0.766560337  | sperm    | gyne |
| 0.853528055  | sperm    | gyne |
| 0.873210222  | sperm    | gyne |
| 0.793108377  | sperm    | gyne |
| 0.815079169  | sperm    | gyne |
| 0.772968485  | sperm    | gyne |
| 0.804551498  | sperm    | gyne |
| 0.034200611  | homo     | gyne |
| 0.272217522  | homo     | gyne |
| 0.372916985  | homo     | gyne |
| -0.043612609 | homo     | gyne |
| -0.01614912  | homo     | gyne |
| 0.272217522  | homo     | gyne |
| 0.01131437   | homo     | gyne |
| 0.061664101  | homo     | gyne |
| 0.276794771  | homo     | gyne |
| -0.024449566 | control- | gyne |
| -0.023194831 | control- | gyne |
| 0.011175651  | control- | gyne |
| 0.006032675  | control- | gyne |
| 0.030436071  | control- | gyne |
| 0.030049563  | sperm    | q1d  |
| 0.11728664   | sperm    | q1d  |
| 0.395008864  | sperm    | q1d  |
| 0.157706307  | sperm    | q1d  |
| 0.316777252  | sperm    | q1d  |
| 0.082203971  | sperm    | q1d  |
| 0.106855759  | sperm    | q1d  |

|              |          |     |
|--------------|----------|-----|
| 0.099154154  | sperm    | q1d |
| 0.065132232  | sperm    | q1d |
| 0.320688833  | sperm    | q1d |
| 0.391097284  | sperm    | q1d |
| 0.159010167  | sperm    | q1d |
| 0.17987193   | sperm    | q1d |
| 0.252888102  | sperm    | q1d |
| 0.232026339  | sperm    | q1d |
| 0.091209436  | sperm    | q1d |
| 0.301130929  | sperm    | q1d |
| 0.009066243  | sperm    | q1d |
| 0.202037554  | sperm    | q1d |
| 0.269838285  | sperm    | q1d |
| 0.342854456  | sperm    | q1d |
| 0.469328896  | sperm    | q1d |
| 0.106855759  | sperm    | q1d |
| 0.424997649  | sperm    | q1d |
| 0.321992693  | sperm    | q1d |
| 0.318081112  | sperm    | q1d |
| 0.344158316  | sperm    | q1d |
| 0.336335155  | sperm    | q1d |
| 0.288092327  | sperm    | q1d |
| 0.411959047  | sperm    | q1d |
| 0.594499476  | homo     | q1d |
| 0.271142145  | homo     | q1d |
| 0.415870628  | homo     | q1d |
| 0.55929525   | homo     | q1d |
| 0.478455918  | homo     | q1d |
| 0.554079809  | homo     | q1d |
| 0.265926704  | homo     | q1d |
| 0.483671358  | homo     | q1d |
| 0.487582939  | homo     | q1d |
| 0.580157014  | homo     | q1d |
| 0.581460874  | homo     | q1d |
| 0.541041207  | homo     | q1d |
| 0.413262907  | homo     | q1d |
| 0.530610326  | homo     | q1d |
| 0.314169532  | homo     | q1d |
| 0.316777252  | homo     | q1d |
| 0.372843241  | homo     | q1d |
| 0.554079809  | homo     | q1d |
| 0.454986434  | homo     | q1d |
| 0.477152057  | homo     | q1d |
| 0.461505735  | homo     | q1d |
| 0.385881843  | homo     | q1d |
| 0.314169532  | homo     | q1d |
| 0.298523209  | homo     | q1d |
| 0.067739953  | homo     | q1d |
| 0.418478348  | homo     | q1d |
| 0.452378713  | homo     | q1d |
| 0.310257951  | homo     | q1d |
| 0.301130929  | homo     | q1d |
| 0.358500779  | homo     | q1d |
| -0.052391843 | control- | q1d |
| 0.007803625  | control- | q1d |
| 0.017899075  | control- | q1d |

|              |          |     |
|--------------|----------|-----|
| 0.026689143  | control- | q1d |
| -0.122775046 | sperm    | q1w |
| -0.475067893 | sperm    | q1w |
| -0.736119427 | sperm    | q1w |
| -0.231757725 | sperm    | q1w |
| -0.307792153 | sperm    | q1w |
| -0.705705656 | sperm    | q1w |
| -0.206412916 | sperm    | q1w |
| -0.18867155  | sperm    | q1w |
| -0.315395595 | sperm    | q1w |
| -0.401567946 | sperm    | q1w |
| -0.538429916 | sperm    | q1w |
| -0.649947076 | sperm    | q1w |
| -0.469998931 | sperm    | q1w |
| -0.122775046 | sperm    | q1w |
| 0.014086924  | sperm    | q1w |
| -0.63220571  | sperm    | q1w |
| -0.072085427 | sperm    | q1w |
| -0.376223137 | sperm    | q1w |
| -0.335671443 | sperm    | q1w |
| 0.03182829   | sperm    | q1w |
| -0.120240565 | sperm    | q1w |
| -0.414240351 | sperm    | q1w |
| -0.307792153 | sperm    | q1w |
| -0.16332674  | sperm    | q1w |
| -0.231757725 | sperm    | q1w |
| -0.693033252 | sperm    | q1w |
| -0.214016359 | sperm    | q1w |
| -0.82736074  | sperm    | q1w |
| -0.302723191 | homo     | q1w |
| -0.533360954 | homo     | q1w |
| -0.419309313 | homo     | q1w |
| -0.196274992 | homo     | q1w |
| -0.297654229 | homo     | q1w |
| -0.462395488 | homo     | q1w |
| -0.02393029  | homo     | q1w |
| -0.269774939 | homo     | q1w |
| -0.173464664 | homo     | q1w |
| -0.368619695 | homo     | q1w |
| -0.312861114 | homo     | q1w |
| -0.049275099 | homo     | q1w |
| -0.791878008 | homo     | q1w |
| -0.310326634 | homo     | q1w |
| -0.267240458 | homo     | q1w |
| -0.363550733 | homo     | q1w |
| -0.672757404 | homo     | q1w |
| -0.267240458 | homo     | q1w |
| -0.018861328 | homo     | q1w |
| -0.406636908 | homo     | q1w |
| -0.198809473 | homo     | q1w |
| -0.330602481 | homo     | q1w |
| -0.016326847 | homo     | q1w |
| 0.039431733  | homo     | q1w |
| -0.026464771 | homo     | q1w |
| -0.092361275 | homo     | q1w |
| -0.525757511 | homo     | q1w |

|              |          |     |
|--------------|----------|-----|
| -0.089826794 | homo     | q1w |
| -0.46746445  | homo     | q1w |
| 0.041341495  | control- | q1w |
| -0.038241206 | control- | q1w |
| -0.025568802 | control- | q1w |
| -0.045303257 | control- | q1w |
| 0.013201583  | control- | q1w |
| 0.023013496  | control- | q1w |
| 0.03155669   | control- | q1w |
| 0.36060628   | sperm    | q2w |
| 0.560562134  | sperm    | q2w |
| -0.136958288 | sperm    | q2w |
| 0.869796188  | sperm    | q2w |
| 0.035096749  | sperm    | q2w |
| 0.049047158  | sperm    | q2w |
| 0.093223451  | sperm    | q2w |
| -0.01372968  | sperm    | q2w |
| -0.506644112 | sperm    | q2w |
| -0.857729391 | sperm    | q2w |
| -0.615922312 | sperm    | q2w |
| 0.26295342   | sperm    | q2w |
| 0.009521     | sperm    | q2w |
| 0.342005735  | sperm    | q2w |
| 0.221102195  | sperm    | q2w |
| 0.002545796  | sperm    | q2w |
| 0.23970274   | sperm    | q2w |
| -0.399690981 | sperm    | q2w |
| -0.036980361 | sperm    | q2w |
| -0.43689207  | sperm    | q2w |
| -0.906555821 | sperm    | q2w |
| -0.44851741  | sperm    | q2w |
| -0.306688258 | sperm    | q2w |
| -0.127658016 | sperm    | q2w |
| 0.13042454   | sperm    | q2w |
| 0.062997566  | sperm    | q2w |
| 0.142049881  | sperm    | q2w |
| 0.121124268  | sperm    | q2w |
| -0.120682812 | sperm    | q2w |
| -0.36481496  | sperm    | q2w |
| -0.216010603 | homo     | q2w |
| 0.207151787  | homo     | q2w |
| 0.19087631   | homo     | q2w |
| 0.258303284  | homo     | q2w |
| 0.165300561  | homo     | q2w |
| -0.408991253 | homo     | q2w |
| 0.090898383  | homo     | q2w |
| 0.018821273  | homo     | q2w |
| -0.102082267 | homo     | q2w |
| -0.197410058 | homo     | q2w |
| -0.164859105 | homo     | q2w |
| 0.056022362  | homo     | q2w |
| 0.016496205  | homo     | q2w |
| 0.346655871  | homo     | q2w |
| 0.195526446  | homo     | q2w |
| 0.093223451  | homo     | q2w |
| 0.132749608  | homo     | q2w |

|              |          |     |
|--------------|----------|-----|
| 0.755867852  | homo     | q2w |
| 0.074622906  | homo     | q2w |
| 0.167625629  | homo     | q2w |
| 0.067647702  | homo     | q2w |
| -0.067206246 | homo     | q2w |
| -0.248561556 | homo     | q2w |
| 0.137399744  | homo     | q2w |
| 0.36060628   | homo     | q2w |
| -0.360164824 | homo     | q2w |
| -0.129983084 | homo     | q2w |
| -0.181134582 | homo     | q2w |
| 0.541961589  | homo     | q2w |
| 0.639614448  | homo     | q2w |
| 0.655889925  | homo     | q2w |
| 0.435008458  | homo     | q2w |
| 0.342005735  | homo     | q2w |
| -0.132308152 | homo     | q2w |
| 0.165300561  | homo     | q2w |
| 0.332705463  | homo     | q2w |
| -0.171834309 | homo     | q2w |
| 0.439658594  | homo     | q2w |
| 0.093223451  | homo     | q2w |
| -0.060231042 | homo     | q2w |
| 0.024140604  | control- | q2w |
| -0.018556399 | control- | q2w |
| -0.006931059 | control- | q2w |
| -0.025034944 | control- | q2w |
| 0.002596357  | control- | q2w |
| 0.0376371    | control- | q2w |
| -0.038231519 | control- | q2w |
| 0.024379858  | control- | q2w |
| 0.602836879  | sperm    | q4w |
| -0.169795578 | sperm    | q4w |
| 0.14226116   | sperm    | q4w |
| 0.309136421  | sperm    | q4w |
| 0.41093033   | sperm    | q4w |
| 0.337505215  | sperm    | q4w |
| 0.280767626  | sperm    | q4w |
| 0.627868169  | sperm    | q4w |
| 0.087192324  | sperm    | q4w |
| -0.393408427 | sperm    | q4w |
| 0.352523988  | sperm    | q4w |
| 0.157279933  | sperm    | q4w |
| -0.341677096 | sperm    | q4w |
| -0.113057989 | sperm    | q4w |
| -0.189820609 | sperm    | q4w |
| 0.028785982  | sperm    | q4w |
| 0.195661243  | sperm    | q4w |
| 0.182311222  | sperm    | q4w |
| -0.513558615 | sperm    | q4w |
| 0.043804756  | sperm    | q4w |
| 0.217355027  | sperm    | q4w |
| 0.212348769  | sperm    | q4w |
| 0.048811014  | sperm    | q4w |
| -0.745515227 | sperm    | q4w |
| 0.48769295   | sperm    | q4w |

|              |          |     |
|--------------|----------|-----|
| 0.073842303  | sperm    | q4w |
| -0.386733417 | sperm    | q4w |
| -0.221526909 | sperm    | q4w |
| -0.251564456 | sperm    | q4w |
| 0.280767626  | sperm    | q4w |
| 0.170629954  | homo     | q4w |
| 0.289111389  | homo     | q4w |
| 0.229036295  | homo     | q4w |
| 0.113892365  | homo     | q4w |
| -0.034626617 | homo     | q4w |
| -0.021276596 | homo     | q4w |
| 0.130579892  | homo     | q4w |
| 0.017104714  | homo     | q4w |
| -0.073007927 | homo     | q4w |
| -0.009595327 | homo     | q4w |
| 0.200667501  | homo     | q4w |
| 0.167292449  | homo     | q4w |
| 0.135586149  | homo     | q4w |
| -0.021276596 | homo     | q4w |
| 0.053817272  | homo     | q4w |
| -0.071339174 | homo     | q4w |
| 0.192323738  | homo     | q4w |
| -0.0880267   | homo     | q4w |
| 0.022110972  | homo     | q4w |
| 0.138923655  | homo     | q4w |
| 0.18731748   | homo     | q4w |
| -0.189820609 | homo     | q4w |
| 0.242386316  | homo     | q4w |
| -0.188151856 | homo     | q4w |
| -0.12640801  | homo     | q4w |
| 0.11055486   | homo     | q4w |
| 0.098873592  | homo     | q4w |
| 0.118898623  | homo     | q4w |
| 0.183979975  | homo     | q4w |
| 0.112223613  | homo     | q4w |
| 0.265748853  | homo     | q4w |
| 0.377555277  | homo     | q4w |
| 0.247392574  | homo     | q4w |
| 0.21902378   | homo     | q4w |
| 0.287442637  | homo     | q4w |
| 0.304130163  | homo     | q4w |
| 0.350855236  | homo     | q4w |
| 0.280767626  | homo     | q4w |
| 0.335836462  | homo     | q4w |
| 0.284105131  | homo     | q4w |
| -0.019607843 | control- | q4w |
| -0.018940342 | control- | q4w |
| 0.031122236  | control- | q4w |
| 0.007425949  | control- | q4w |
| 0            | control- | q4w |

---



### Script 1. R code for the analyses of the data.

```
#####  
#### R code ####  
#####  
  
# Useful functions:  
# *****  
sidak <- function (p, n) {  
  P <- 1-(1-p)^n  
  return(P)  
}  
source("anova.2way.unbalanced.R")  
source("t.perm.R")  
  
# Data:  
#*****  
data <- read.table("data.txt", h = TRUE, sep = " ")  
dataf <- read.table("dataf.txt", h = TRUE, sep = " ")  
  
# Do the negative control differ from 0?  
# *****  
control <- subset(data, tissue == "c-")  
mod_cont <- lm(ABA ~ 1, data = control)  
summary(mod_cont)  
  
# I. General significance test of the model: comparisons between females  
# *****  
test <- anova.2way.unbalanced(dataf$ABA, dataf$tissue, dataf$ind, model="direct",  
nperm = 9999, strata=FALSE, silent=FALSE)  
test  
  
# II. Multiple comparisons by permutations:  
# *****  
# We create a list for the dataframe subsets. The subsets are combinations of levels of  
our two  
# factors.  
listdata <- vector("list", 18)  
names(listdata) <- c("homo_male", "homo_gyne", "homo_q1d", "homo_q1w",  
"homo_q2w", "homo_q4w", "sperm_male", "sperm_gyne", "sperm_q1d", "sperm_q1w",  
"sperm_q2w", "sperm_q4w", "control_male", "control_gyne", "control_q1d",  
"control_q1w", "control_q2w", "control_q4w")  
  
homo <- subset(data, tissue == "homo")  
listdata[[1]] <- subset(homo, ind == "male")  
listdata[[2]] <- subset(homo, ind == "gyne")  
listdata[[3]] <- subset(homo, ind == "q1d")  
listdata[[4]] <- subset(homo, ind == "q1w")  
listdata[[5]] <- subset(homo, ind == "q2w")  
listdata[[6]] <- subset(homo, ind == "q4w")
```

```
sperm <- subset(data, tissue == "sperm")
listdata[[7]] <- subset(sperm, ind == "male")
listdata[[8]] <- subset(sperm, ind == "gyne")
listdata[[9]] <- subset(sperm, ind == "q1d")
listdata[[10]] <- subset(sperm, ind == "q1w")
listdata[[11]] <- subset(sperm, ind == "q2w")
listdata[[12]] <- subset(sperm, ind == "q4w")
control <- subset(data, tissue == "c-")
listdata[[13]] <- subset(control, ind == "male")
listdata[[14]] <- subset(control, ind == "gyne")
listdata[[15]] <- subset(control, ind == "q1d")
listdata[[16]] <- subset(control, ind == "q1w")
listdata[[17]] <- subset(control, ind == "q2w")
listdata[[18]] <- subset(control, ind == "q4w")
# Matrix of comparisons defining the elements of listdata to be compared:
matcomp <- matrix(c(1, 13,
  2, 14,
  3, 15,
  4, 16,
  5, 17,
  6, 18,
  7, 13,
  8, 14,
  9, 15,
  10, 16,
  11, 17,
  12, 18,
  1, 7,
  2, 8,
  3, 9,
  4, 10,
  5, 11,
  6, 12,
  2, 3,
  3, 4,
  4, 5,
  5, 6,
  8, 9,
  9, 10,
  10, 11,
  11, 12), ncol = 2, byrow = TRUE)
row.names(matcomp) <- c("homo_male-control", "homo_gyne-control", "homo_q1d-
control",
  "homo_q1w-control", "homo-q2w_control", "homo q4w_control",
  "sperm male_control", "sperm gyne_control", "sperm q1d_control",
  "sperm q1w_control", "sperm q2w_control", "sperm q4w_control",
  "homo_male - sperm_male", "homo_gyne - sperm_gyne",
  "homo_q1d - sperm_q1d", "homo_q1w - sperm_q1w",
  "homo_q2w - sperm_q2w", "homo_q4w - sperm_q4w",
  "homo_gyne - homo_q1d", "homo_q1d - homo_q1w",
```

```
"homo_q1w - homo_q2w", "homo_q2w - homoq4w",  
"sperm_gyne - sperm_q1d", "sperm_q1d - sperm_q1w",  
"sperm_q1w - sperm_q2w", "sperm_q2w - spermq4w")
```

```
# We create a result matrix containing three columns: 'tref' for the observed t.Student  
  
# statistic values, 'p_uncorr' for the uncorrected p-value as obtained with the  
# permutation  
# test, and 'p_corr' for the p-value after performing a Sidak correction for multiple  
# comparisons (here, nb of tests = 30). The latter prevents an inflation of the type I error  
  
# rate and is therefore necessary.  
matresults <- matrix(ncol = 3, nrow = nrow(matcomp))  
colnames(matresults) <- c("t.ref", "p_uncorr", "p_corr")  
row.names(matresults) <- row.names(matcomp)  
for (i in 1:nrow(matcomp)) {  
  t <- t.perm(listdata[[matcomp[i, 1]]]$ABA, listdata[[matcomp[i, 2]]]$ABA, nperm =  
  9999,  
  silent = TRUE)  
  matresults[i, 1] <- t$t.ref  
  matresults[i, 2] <- t$p.perm  
  matresults[i, 3] <- sidak(t$p.perm, nrow(matcomp))  
}  
write.table(matresults, file = "Results - Mult. comparisons.txt", sep = "\t")
```
